# Supplementary material for: Itk is required for Th9 differentiation via TCR-mediated induction of IL-2 and IRF4
Source: PubMed Central journal article supplement (PMC4782063; doi:10.1038/ncomms10857), 2016-03-03
Supplement: ncomms10857-s1.pdf [file ncomms10857-s1.pdf]

Gomez-Rodriguez et al. Supplementary Figures

Supplementary Figure 1

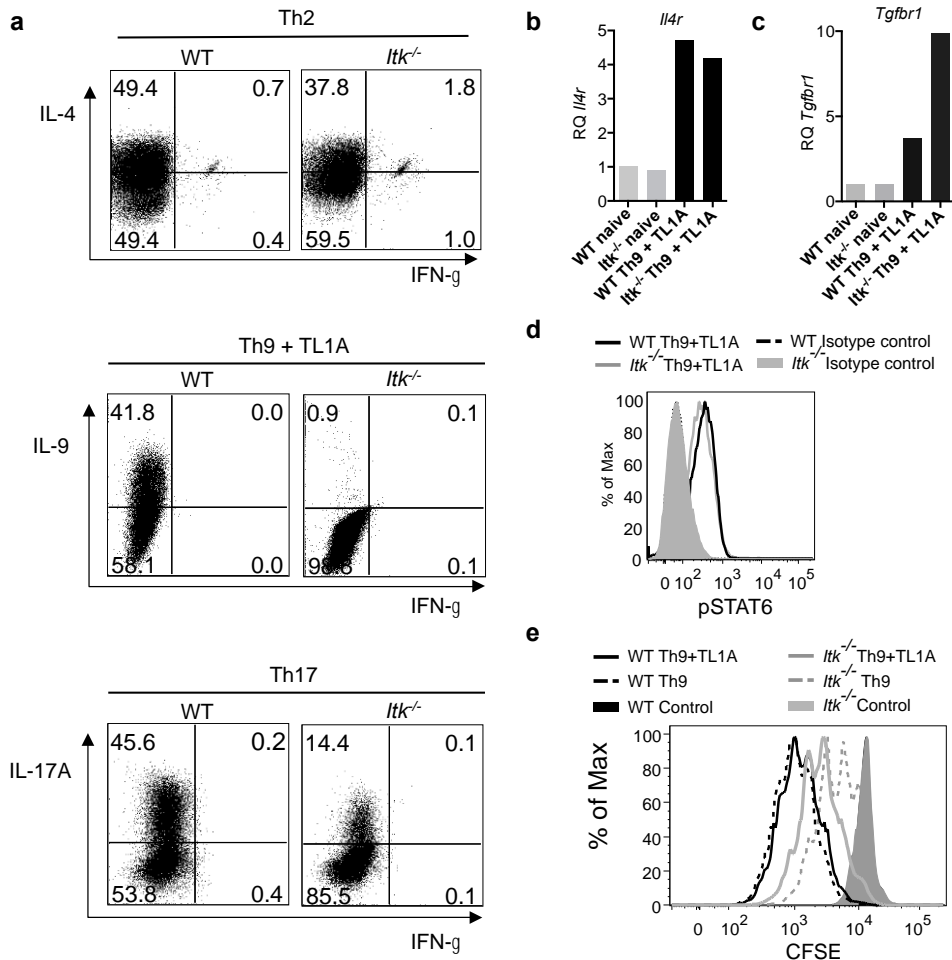

**Supplementary Fig. 1. *Itk* is required for Th9 differentiation.** (a) Sorted naïve CD4<sup>+</sup> T cells from WT and *Itk*<sup>-/-</sup> mice were differentiated under Th2, Th9 plus TL1A, or Th17 conditions, cells were restimulated with PMA and Ionomycin and IL-4, IL9, IL17A and IFN $\gamma$  were evaluated by intracellular staining. (b,c) mRNA for *Il4r* (b) and *Tgfb1* (c) was determined by qRT-PCR from CD4 T cells from WT and *Itk*<sup>-/-</sup> mice differentiated under Th9 plus TL1A conditions. (d) Sorted naïve CD4<sup>+</sup> T cells from WT and *Itk*<sup>-/-</sup> mice were differentiated under Th9 plus TL1A conditions for 3 days and pSTAT6 was determined by flow cytometry: WT (black), *Itk*<sup>-/-</sup> (grey) lines. (e) Sorted naïve CD4<sup>+</sup> T cells from WT and *Itk*<sup>-/-</sup> mice were stained with CFSE and differentiated under Th9 plus TL1A conditions, WT (black), *Itk*<sup>-/-</sup> (grey) lines. Full grey (*Itk*<sup>-/-</sup>) or black (WT) curves correspond to non-activated labeled cells. Cells were restimulated with PMA and Ionomycin and stained for IL-9 and IFN- $\gamma$ . Results in (a-e) are representative of one out of at least 3 independent experiments.

## Supplementary Figure 2

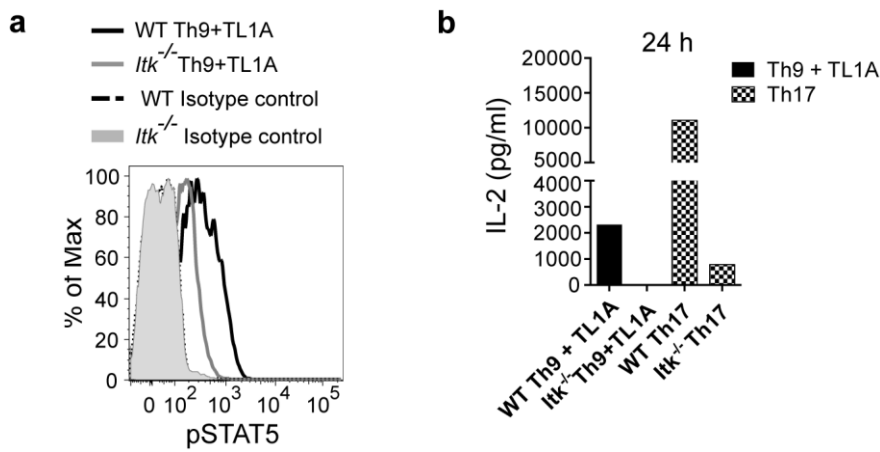

**Supplementary Fig. 2. Defects in IL-2 signaling in *Itk*-deficient cells.** (a) Sorted naïve CD4<sup>+</sup> T cells from WT and *Itk*<sup>-/-</sup> mice were differentiated under Th9 plus TL1A conditions and pSTAT5 levels were determined by flow cytometry at 24h: WT (black), *Itk*<sup>-/-</sup> (grey) lines. (b) Sorted naïve CD4<sup>+</sup> T cells from WT and *Itk*<sup>-/-</sup> mice were differentiated as in (a) or under Th17 conditions and IL-2 levels were determined in supernatants at 24h by Luminex. Results in (a,b) are representative of one out of at least 3 independent experiments.

### Supplementary Figure 3

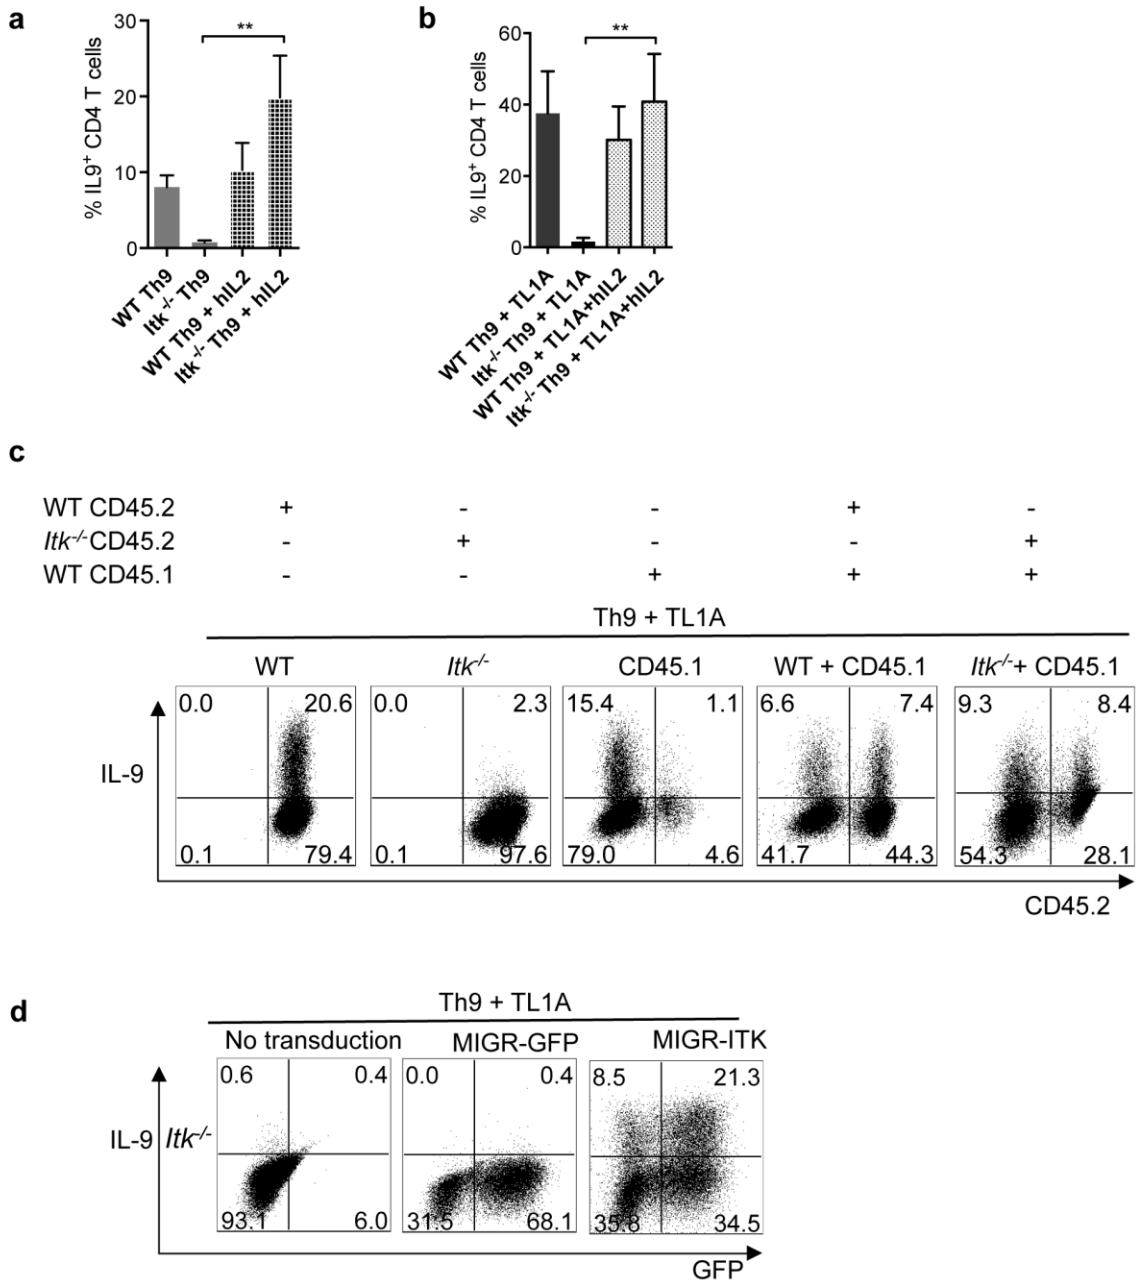

**Supplementary Fig. 3. IL-2 rescues the defect in Th9 differentiation in *Itk*-deficient cells.** (a,b) Sorted naïve CD4<sup>+</sup> T cells from WT and *Itk*<sup>-/-</sup> mice were differentiated under Th9 (a) or Th9 plus TL1A (b) conditions in absence or presence of anti-murine IL-2 plus hIL2. IL-9 production was determined by intracellular staining after PMA and Ionomycin restimulation. The panels show means ± s.e.m. of IL-9<sup>+</sup> CD4<sup>+</sup> T cells from 5 independent experiments, \*\* p <

0.01, determined by two-tailed unpaired Student's t-test. **(c)** Sorted naïve CD4<sup>+</sup> T cells from WT or *Itk*<sup>-/-</sup> CD45.2 mice were cultured either alone (left two plots) or with naïve CD4<sup>+</sup> T cells from CD45.1 mice (right two plots) plus WT CD45.2 APCs and differentiated for 3 days under Th9 conditions plus TL1A as indicated in the Table. Cells were restimulated with PMA and Ionomycin and IL-9 determined by flow cytometry. CD45.2 staining cells in the CD45.1 alone sample are presumed to be derived from contamination from the WT CD45.2 APC population. **(d)** IL-9 production by *Itk*<sup>-/-</sup> is rescued by re-expression of *Itk*. *Itk*-deficient CD4<sup>+</sup> T cells were transduced with the indicated retroviruses, differentiated under Th9 plus TL1A and IL-9 production was determined by intracellular staining after PMA and Ionomycin restimulation. Data in **(c,d)** are representative of one out of 3 different experiments.

## Supplementary Figure 4

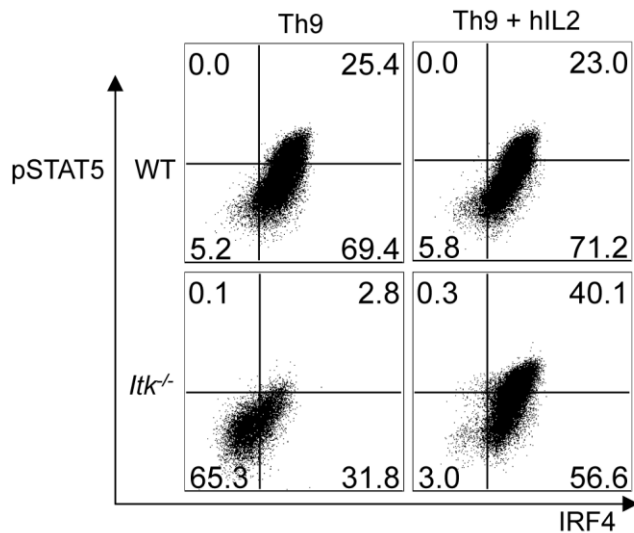

**Supplemental Fig. 4. IL2 rescues pSTAT5 expression under weak TCR signaling.** Sorted naïve CD4<sup>+</sup> T cells from WT and *Itk*<sup>-/-</sup> mice were differentiated under Th9 conditions in absence or presence of anti-murine IL2 plus hIL-2 and analyzed for pSTAT5 and IRF4 production by intracellular staining. Data are representative of one out of 3 independent experiments.
